# Supplementary material for: Germacranes and m-Menthane from Illicium lanceolatum
Source: Molecules. 2014 Apr 4;19(4):4326–37. doi: 10.3390/molecules19044326 (PMC6271484; doi:10.3390/molecules19044326)

## Supplementary Figures

For Compound 1

**Figure S1.**  $^1\text{H}$ -NMR spectrum of Compound **1** in  $\text{CD}_3\text{OD}$ .

**Figure S2.**  $^{13}\text{C}$ -NMR spectrum of Compound **1** in  $\text{CD}_3\text{OD}$ .

**Figure S3.**  $^1\text{H}$ - $^1\text{H}$  COSY spectrum of Compound **1** in  $\text{CD}_3\text{OD}$ .

**Figure S4.** gHSQC spectrum of Compound **1** in  $\text{CD}_3\text{OD}$ .

**Figure S5.** gHMBC spectrum of Compound **1** in  $\text{CD}_3\text{OD}$ .

**Figure S6.** NOESY spectrum of Compound **1** in  $\text{CD}_3\text{OD}$ .

**Figure S7.** HRESIMS spectrum of Compound **1**.

**Figure S8.** Absolute configuration determination for C-1 and C-5 in **1** by modified Mosher's ester method.

For Compound 2

**Figure S9.**  $^1\text{H}$ -NMR spectrum of Compound **2** in  $\text{CD}_3\text{OD}$ .

**Figure S10.**  $^{13}\text{C}$ -NMR spectrum of Compound **2** in  $\text{CD}_3\text{OD}$ .

**Figure S11.**  $^1\text{H}$ - $^1\text{H}$  COSY spectrum of Compound **2** in  $\text{CD}_3\text{OD}$ .

**Figure S12.** gHSQC spectrum of Compound **2** in  $\text{CD}_3\text{OD}$ .

**Figure S13.** gHMBC spectrum of Compound **2** in  $\text{CD}_3\text{OD}$ .

**Figure S14.** NOESY spectrum of Compound **2** in  $\text{CD}_3\text{OD}$ .

**Figure S15.** HRESIMS spectrum of Compound **2**.

For Compound 3

**Figure S16.**  $^1\text{H}$ -NMR spectrum of Compound **3** in  $\text{CD}_3\text{OD}$ .

**Figure S17.**  $^1\text{H}$ -NMR spectrum of Compound **3** in  $\text{CDCl}_3$ .

**Figure S18.**  $^{13}\text{C}$ -NMR spectrum of Compound **3** in  $\text{CD}_3\text{OD}$ .

**Figure S19.**  $^1\text{H}$ - $^1\text{H}$  COSY spectrum of Compound **3** in  $\text{CD}_3\text{OD}$ .

**Figure S20.** gHSQC spectrum of Compound **3** in  $\text{CD}_3\text{OD}$ .

**Figure S21.** gHMBC spectrum of Compound **3** in  $\text{CD}_3\text{OD}$ .

**Figure S22.** NOESY spectrum of Compound **3** in  $\text{CD}_3\text{OD}$ .

**Figure S23.** NOESY spectrum of Compound **3** in  $\text{CDCl}_3$ .

**Figure S24.** HRESIMS spectrum of Compound **3**.

For Compound 4

**Figure S25.**  $^1\text{H}$ -NMR spectrum of Compound **4** in  $\text{CD}_3\text{OD}$ .

**Figure S26.**  $^{13}\text{C}$ -NMR spectrum of Compound **4** in  $\text{CD}_3\text{OD}$ .

**Figure S27.**  $^1\text{H}$ - $^1\text{H}$  COSY spectrum of Compound **4** in  $\text{CD}_3\text{OD}$ .

**Figure S28.** gHSQC spectrum of Compound **4** in  $\text{CD}_3\text{OD}$ .

**Figure S29.** gHMBC spectrum of Compound **4** in  $\text{CD}_3\text{OD}$ .

**Figure S30.** NOESY spectrum of Compound **4** in  $\text{CD}_3\text{OD}$ .

**Figure S31.** HRESIMS spectrum of Compound **4**.

For Compound 5

**Figure S32.**  $^1\text{H}$ -NMR spectrum of Compound 5 in  $\text{CDCl}_3$ .

**Figure S33.**  $^{13}\text{C}$ -NMR spectrum of Compound 5 in  $\text{CDCl}_3$ .

**Figure S34.**  $^1\text{H}$ - $^1\text{H}$  COSY spectrum of Compound 5 in  $\text{CDCl}_3$ .

**Figure S35.** gHSQC spectrum of Compound 5 in  $\text{CDCl}_3$ .

**Figure S36.** gHMBC spectrum of Compound 5 in  $\text{CDCl}_3$ .

**Figure S37.** NOESY spectrum of Compound 5 in  $\text{CDCl}_3$ .

**Figure S38.** HRESIMS spectrum of Compound 5.

**Figure S1.**  $^1\text{H}$ -NMR spectrum of Compound 1 in  $\text{CD}_3\text{OD}$ .

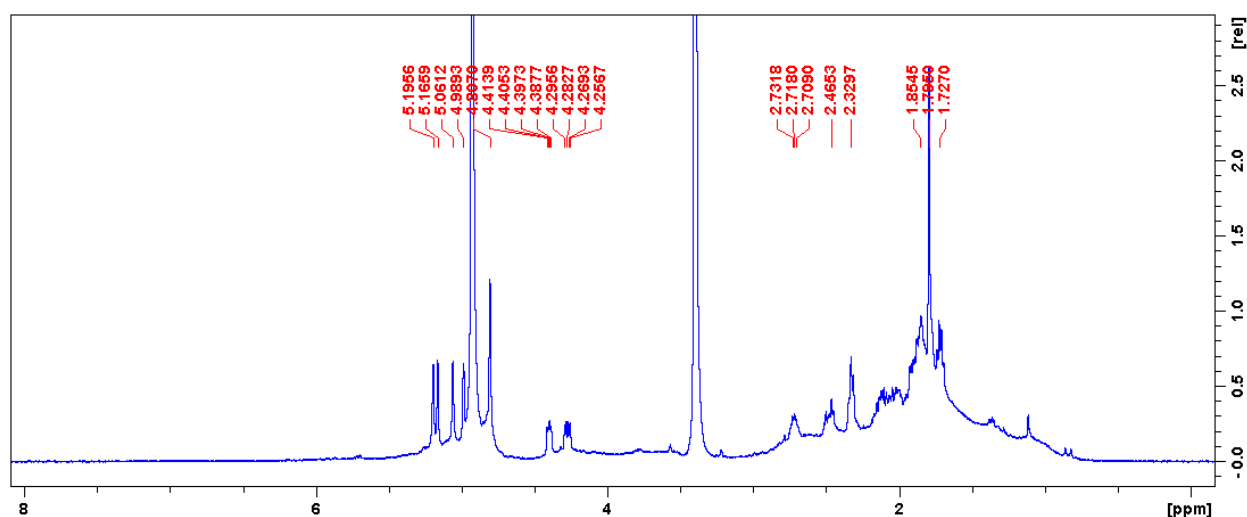

**Figure S2.**  $^{13}\text{C}$ -NMR spectrum of Compound 1 in  $\text{CD}_3\text{OD}$ .

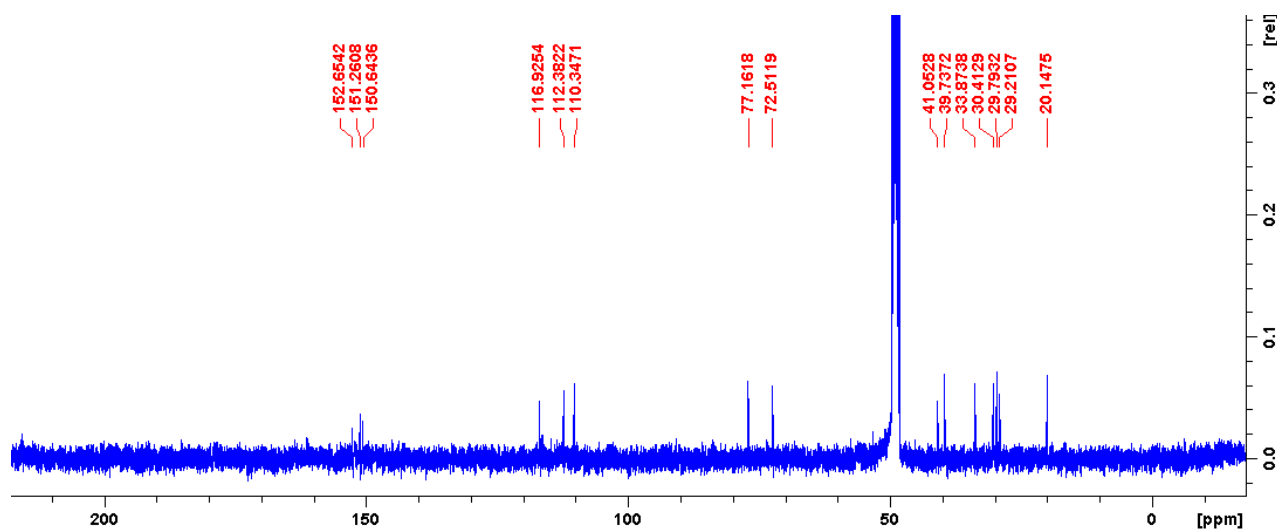

**Figure S3.**  $^1\text{H}$ - $^1\text{H}$  COSY spectrum of Compound **1** in  $\text{CD}_3\text{OD}$ .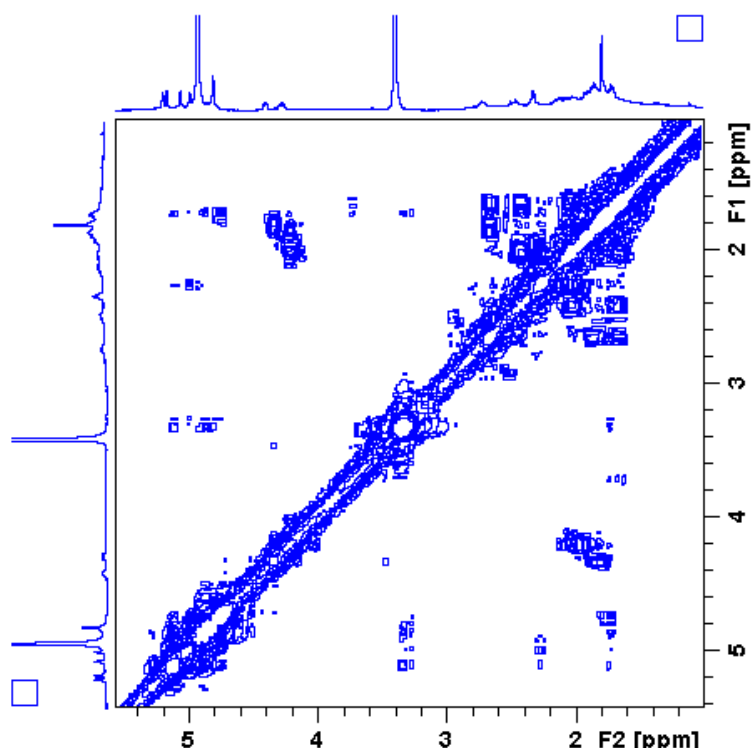**Figure S4.** gHSQC spectrum of Compound **1** in  $\text{CD}_3\text{OD}$ .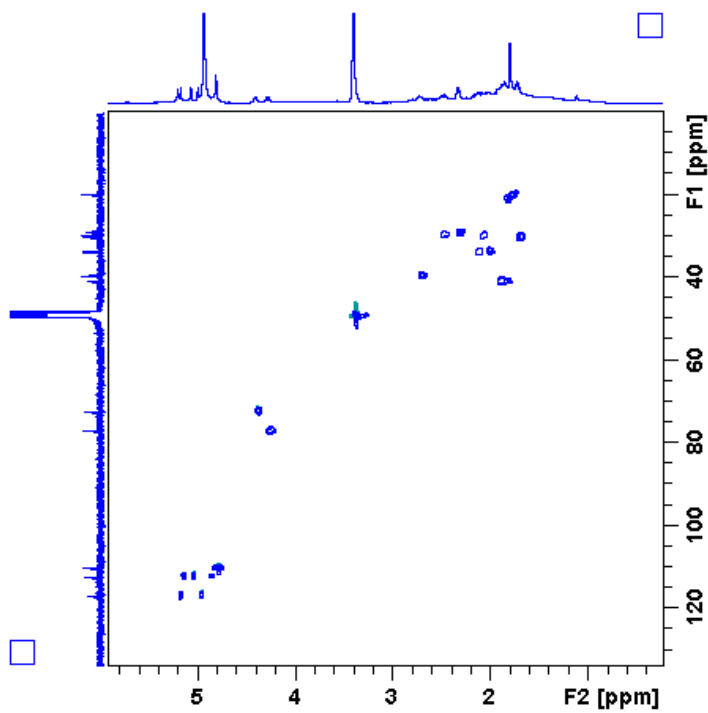

**Figure S5.** gHMBC spectrum of Compound **1** in CD<sub>3</sub>OD.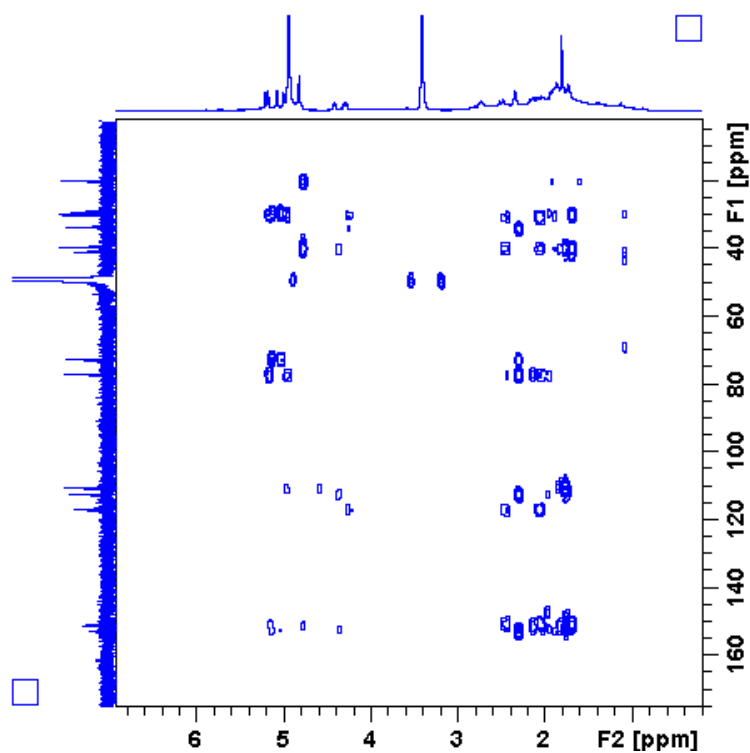**Figure S6.** NOESY spectrum of Compound **1** in CD<sub>3</sub>OD.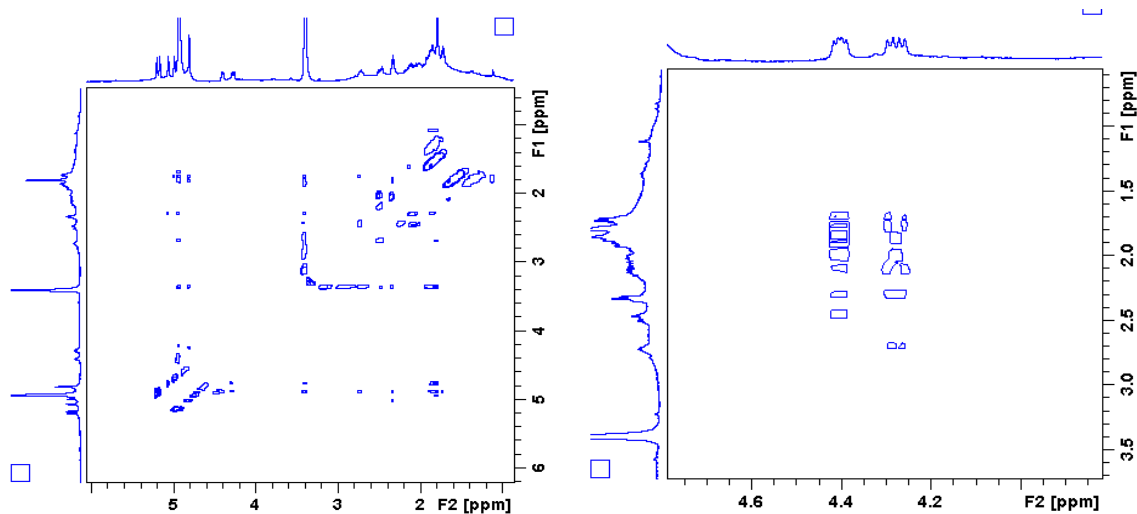**Figure S7.** HRESIMS spectrum of Compound **1**.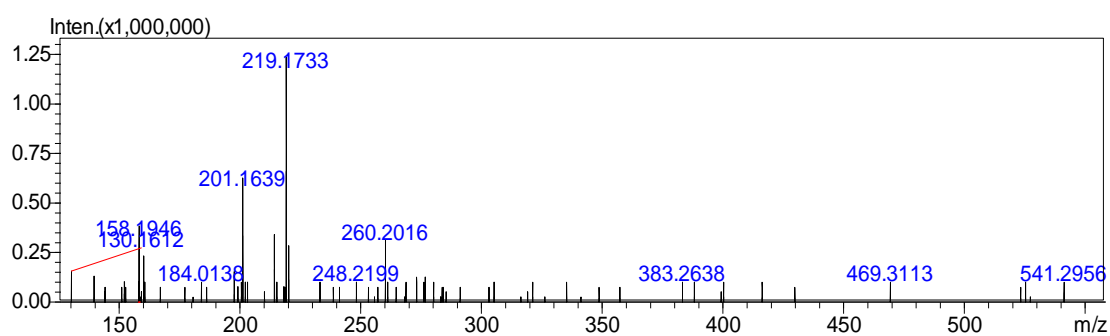

**Figure S8.** Absolute configuration determination for C-1 and C-5 in **1** by modified Mosher's ester method.

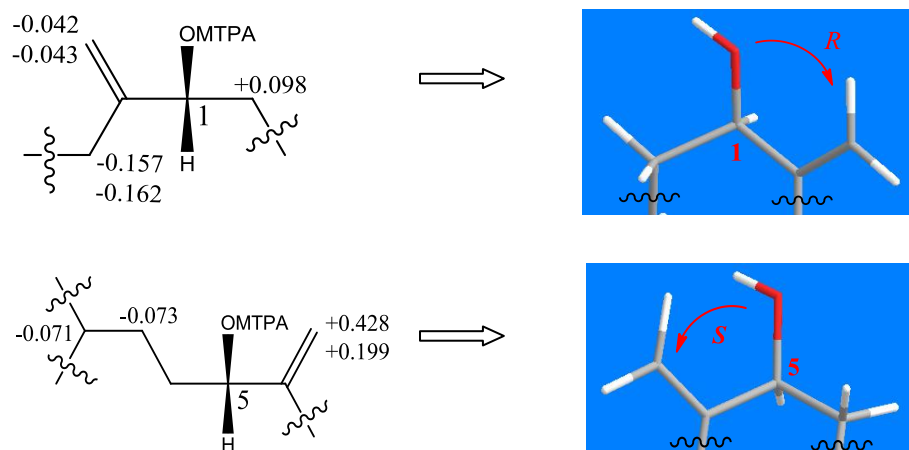

**Figure S9.**  $^1\text{H}$ -NMR spectrum of Compound **2** in  $\text{CD}_3\text{OD}$ .

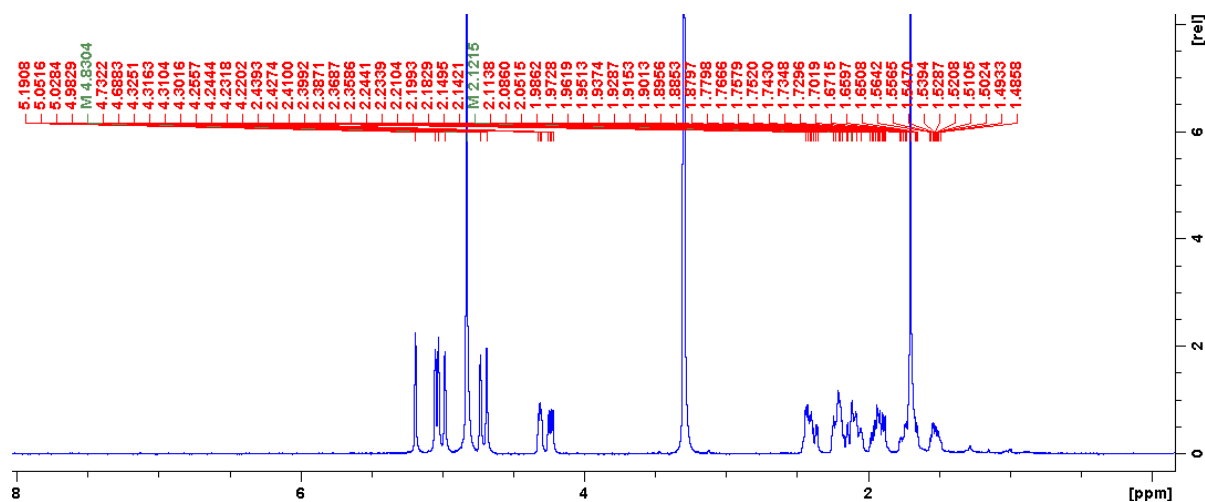

**Figure S10.**  $^{13}\text{C}$ -NMR spectrum of Compound **2** in  $\text{CD}_3\text{OD}$ .

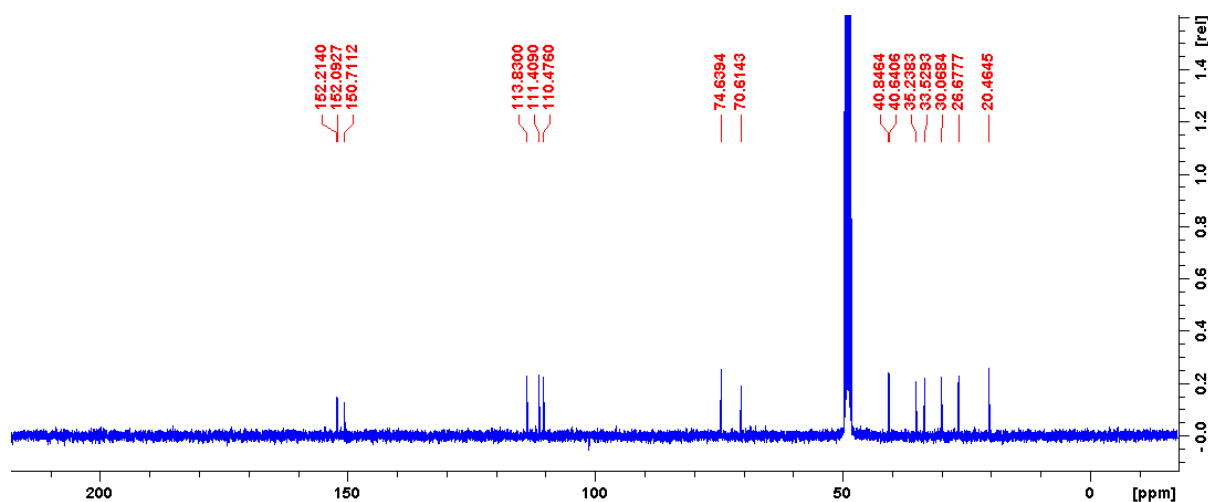

**Figure S11.**  $^1\text{H}$ - $^1\text{H}$  COSY spectrum of Compound 2 in  $\text{CD}_3\text{OD}$ .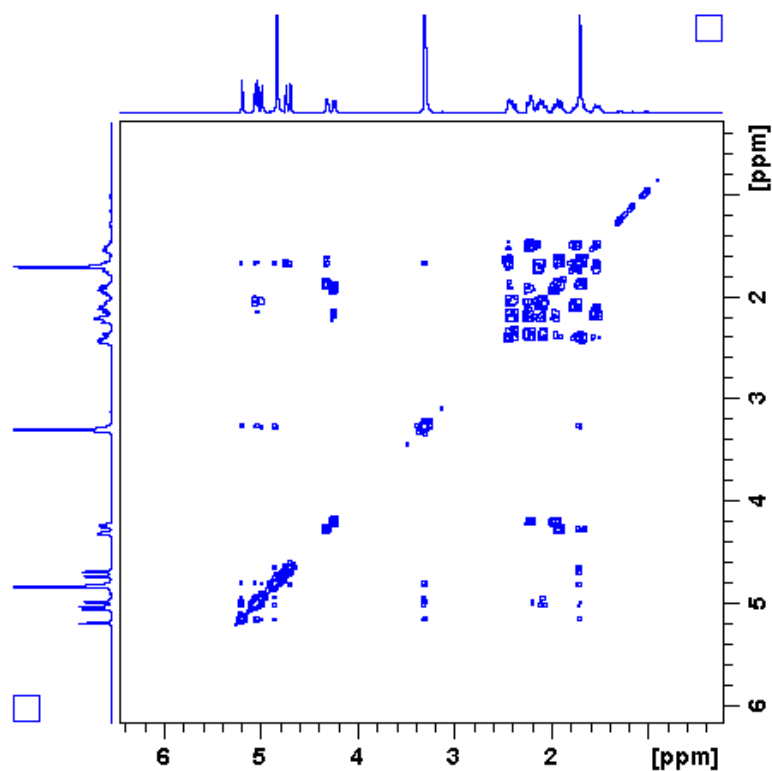**Figure S12.** gHSQC spectrum of Compound 2 in  $\text{CD}_3\text{OD}$ .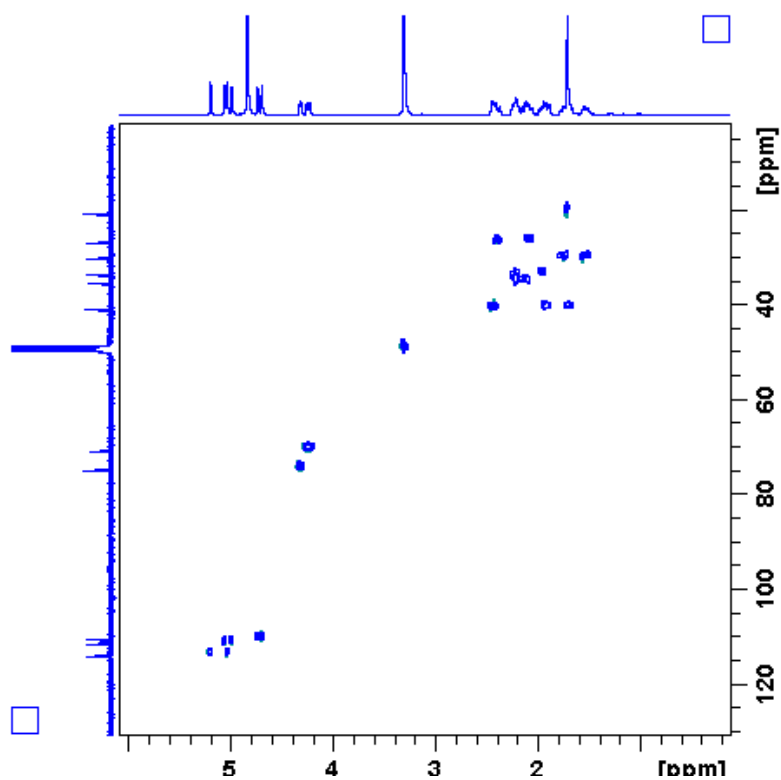

**Figure S13.** gHMBC spectrum of Compound 2 in CD<sub>3</sub>OD.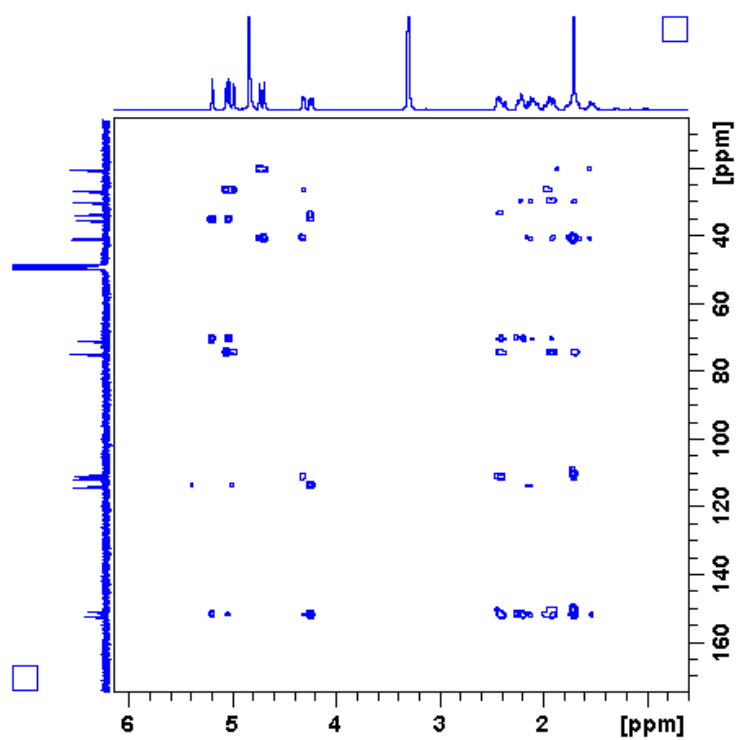**Figure S14.** NOESY spectrum of Compound 2 in CD<sub>3</sub>OD.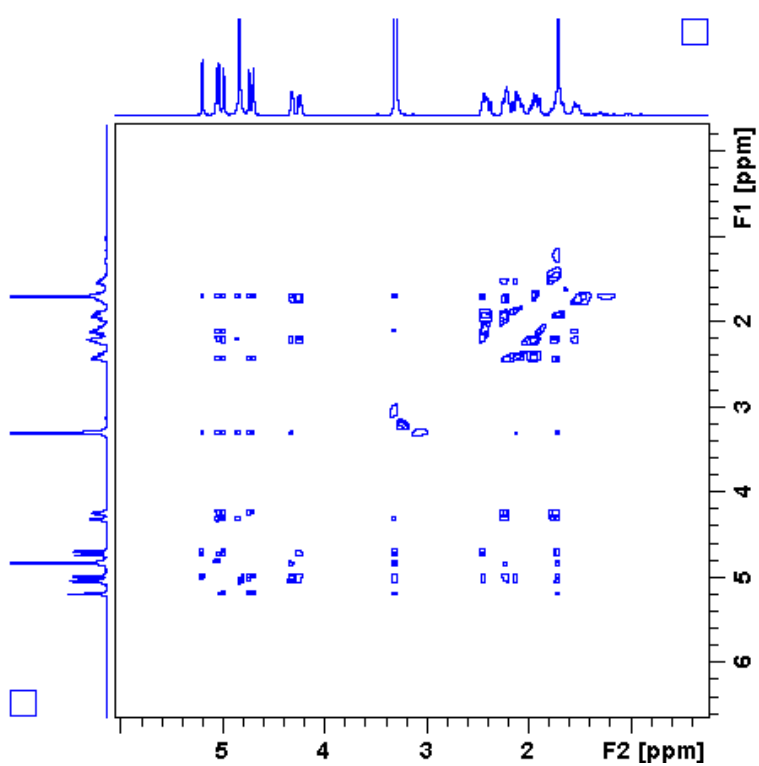

**Figure S15.** HRESIMS spectrum of Compound 2.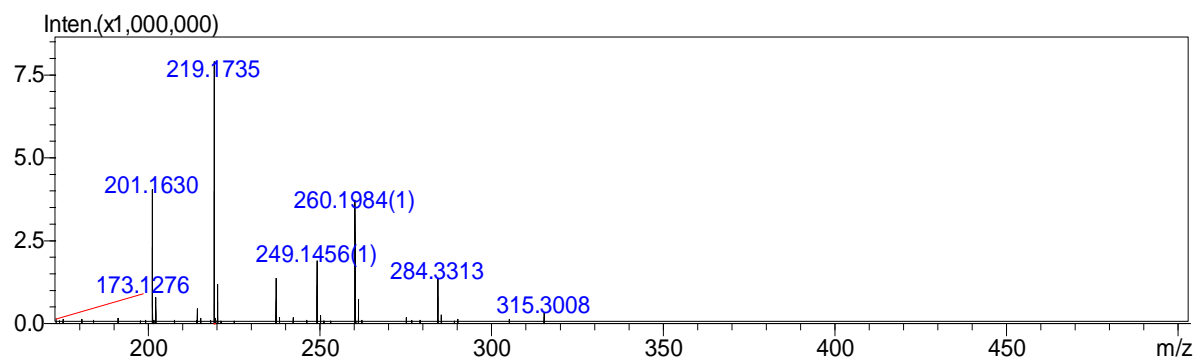**Figure S16.**  $^1\text{H}$ -NMR spectrum of Compound 3 in  $\text{CD}_3\text{OD}$ .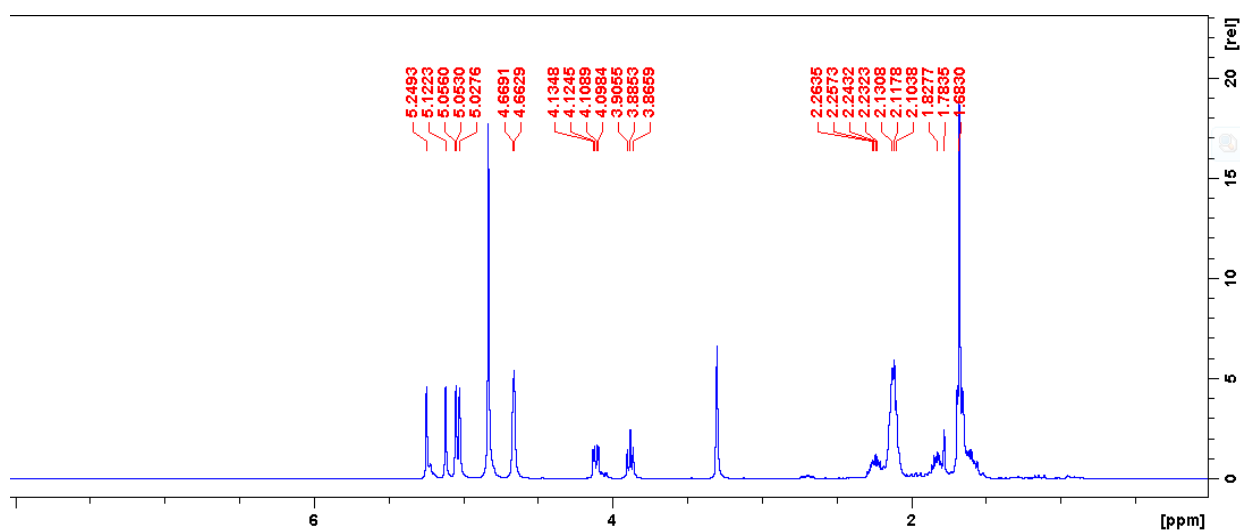**Figure S17.**  $^1\text{H}$ -NMR spectrum of Compound 3 in  $\text{CDCl}_3$ .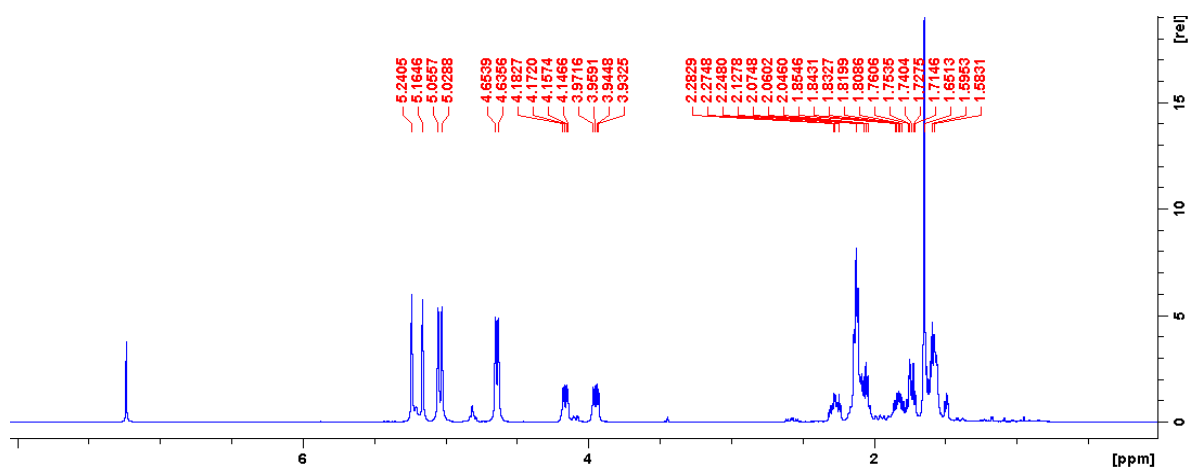

**Figure S18.**  $^{13}\text{C}$ -NMR spectrum of Compound **3** in  $\text{CD}_3\text{OD}$ .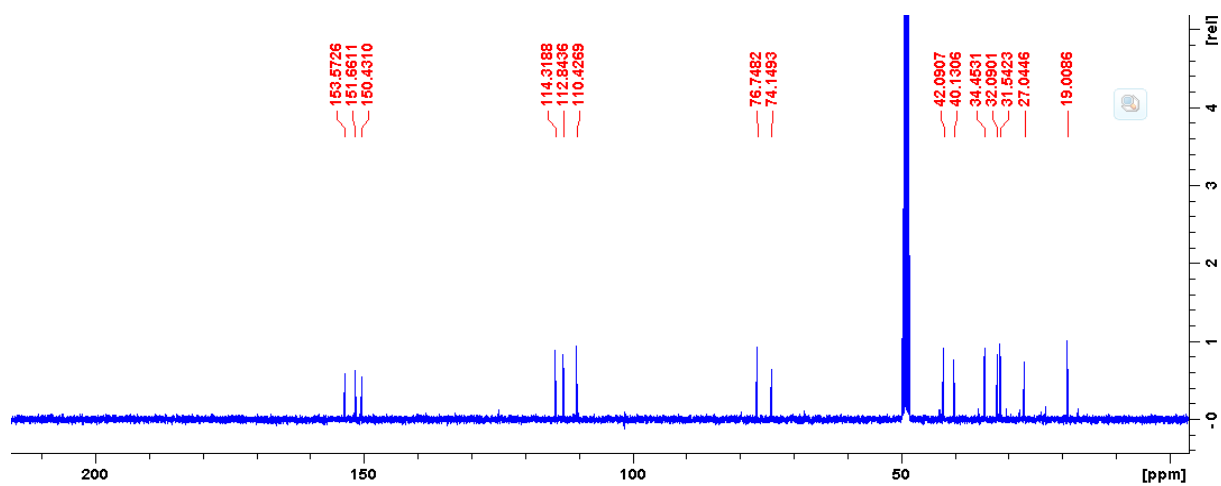**Figure S19.**  $^1\text{H}$ - $^1\text{H}$  COSY spectrum of Compound **3** in  $\text{CD}_3\text{OD}$ .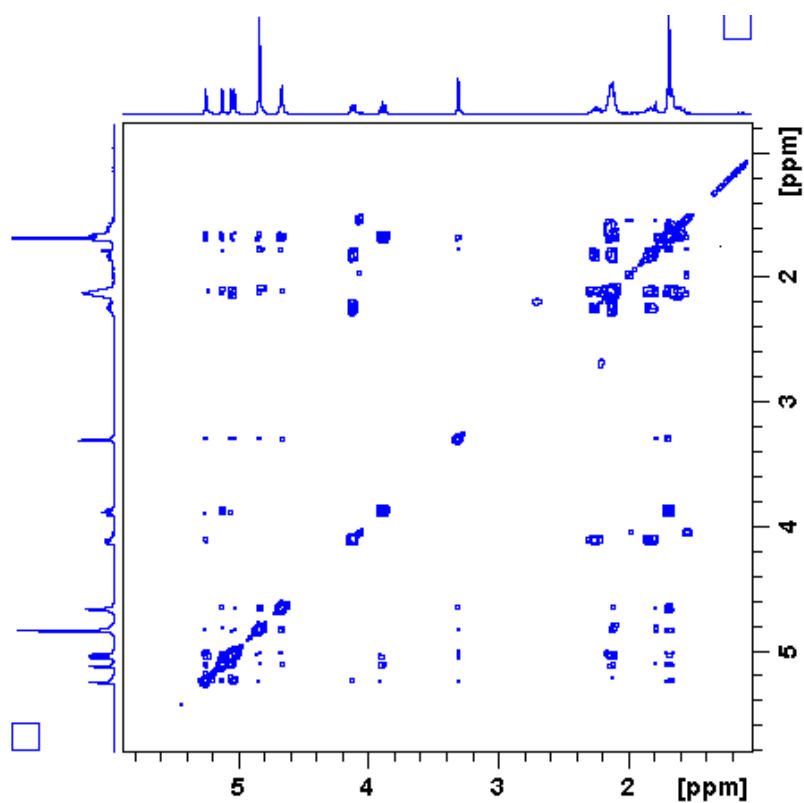

**Figure S20.** gHSQC spectrum of Compound 3 in CD<sub>3</sub>OD.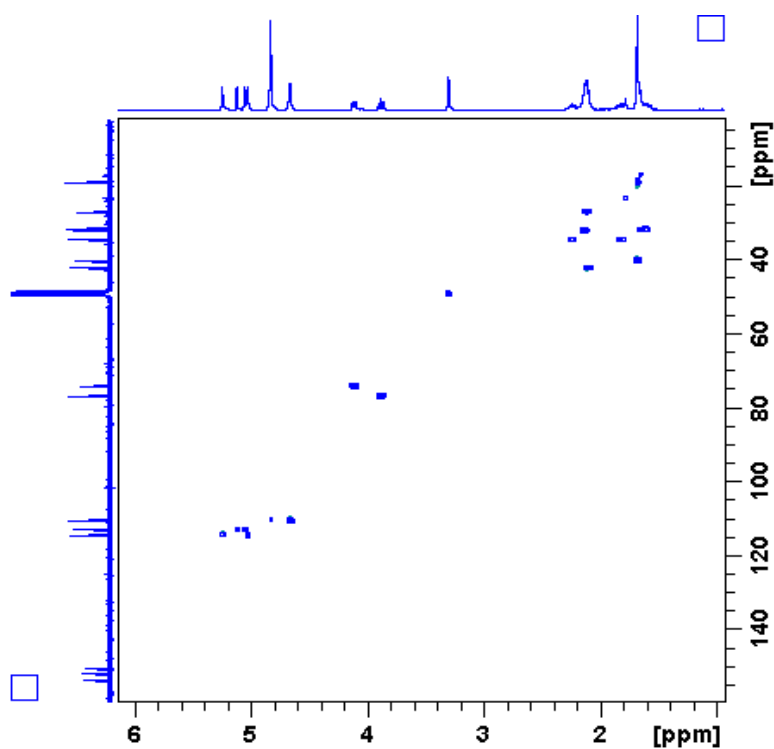**Figure S21.** gHMBC spectrum of Compound 3 in CD<sub>3</sub>OD.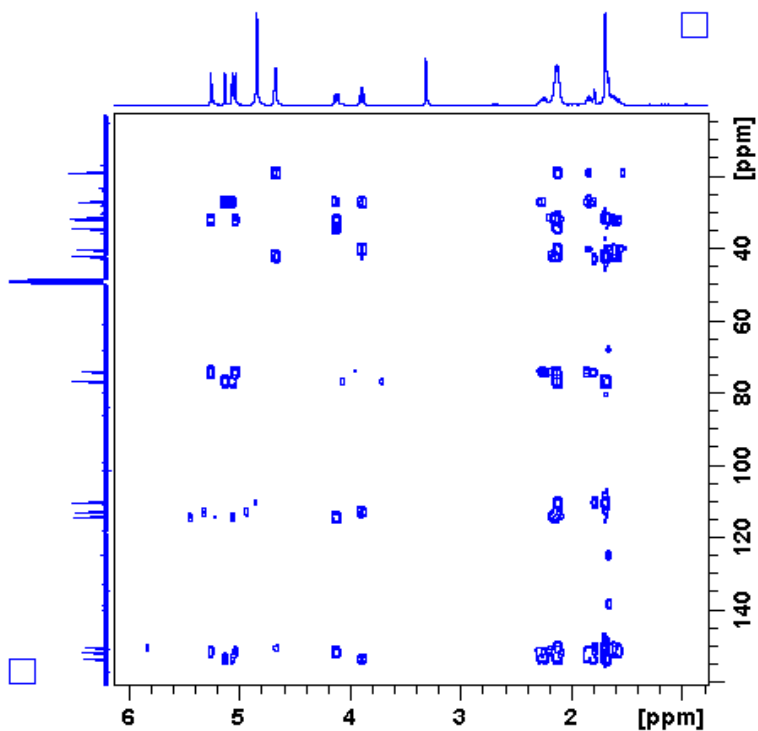

**Figure S22.** NOESY spectrum of Compound **3** in CD<sub>3</sub>OD.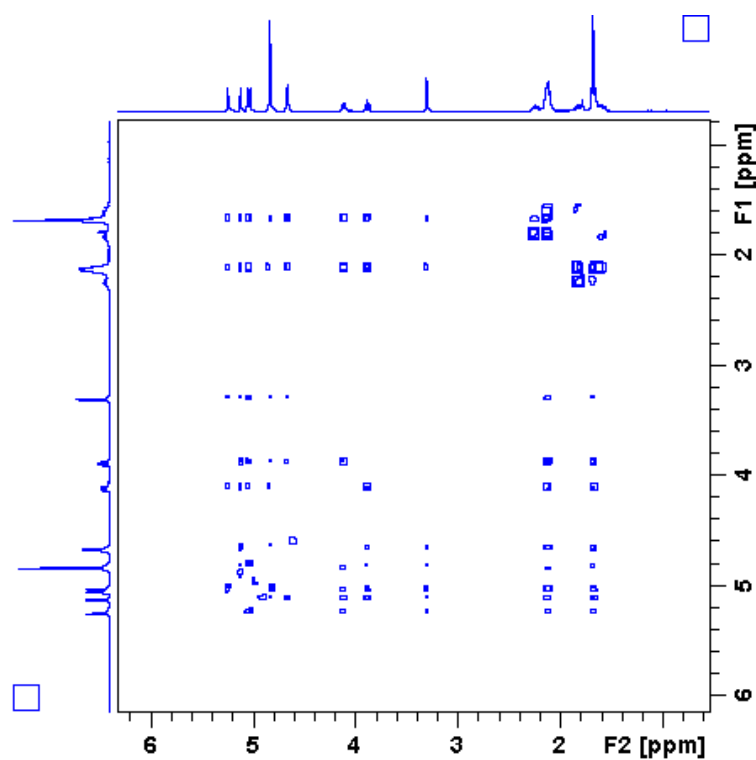**Figure S23.** NOESY spectrum of Compound **3** in CDCl<sub>3</sub>.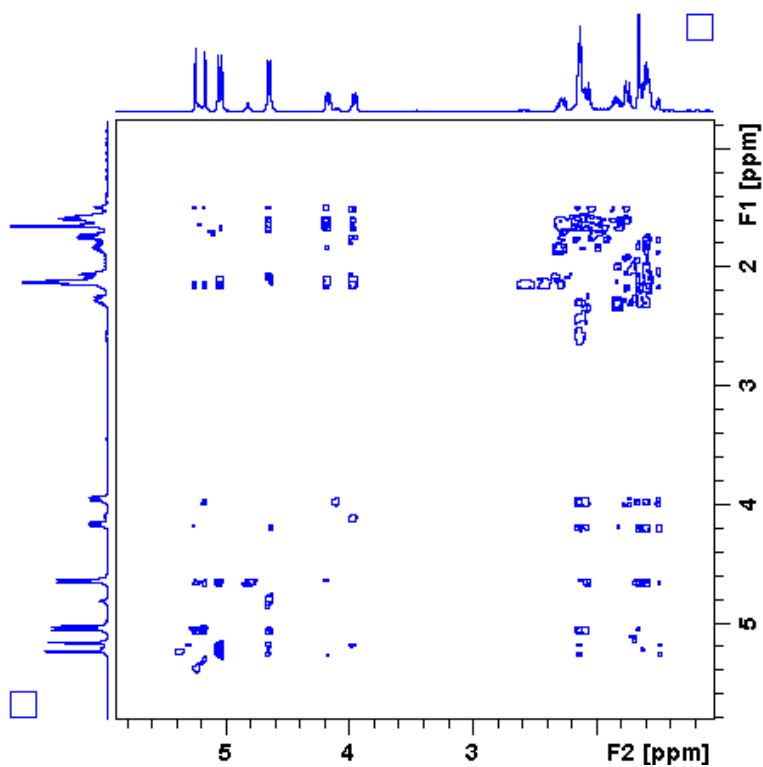

**Figure S24.** HRESIMS spectrum of Compound 3.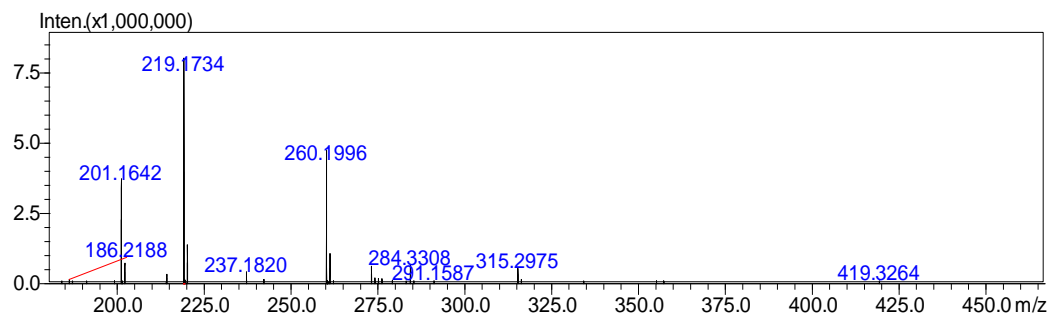**Figure S25.**  $^1\text{H}$ -NMR spectrum of Compound 4 in  $\text{CD}_3\text{OD}$ .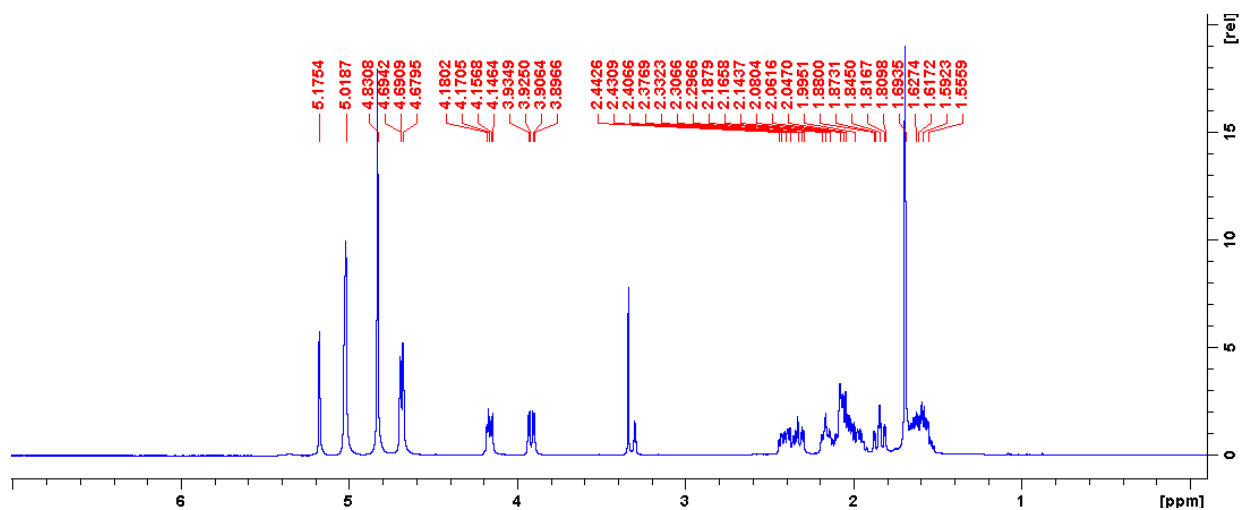**Figure S26.**  $^{13}\text{C}$ -NMR spectrum of Compound 4 in  $\text{CD}_3\text{OD}$ .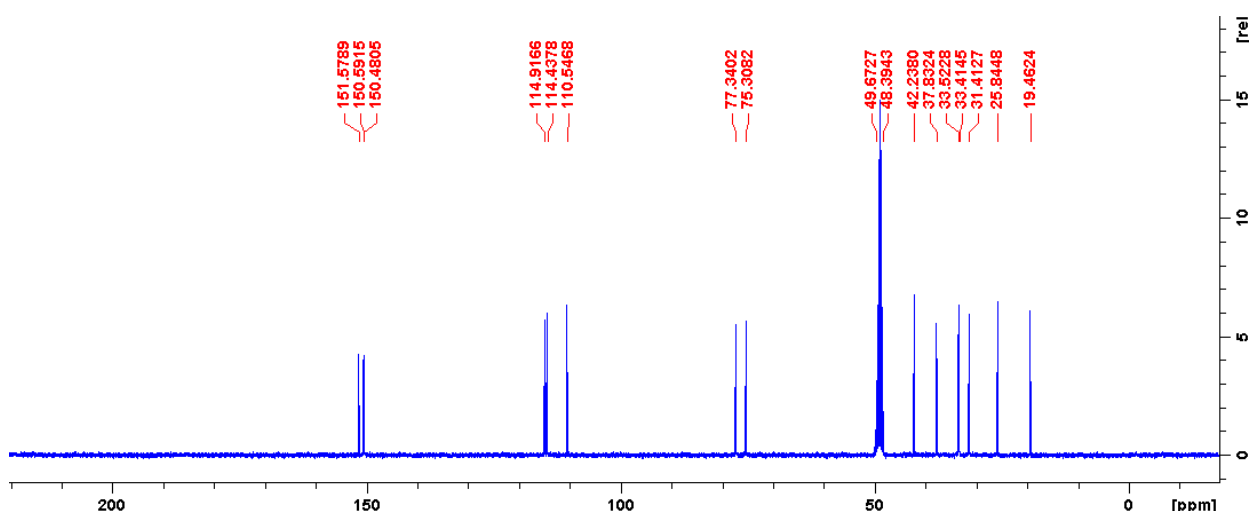

**Figure S27.**  $^1\text{H}$ - $^1\text{H}$  COSY spectrum of Compound **4** in  $\text{CD}_3\text{OD}$ .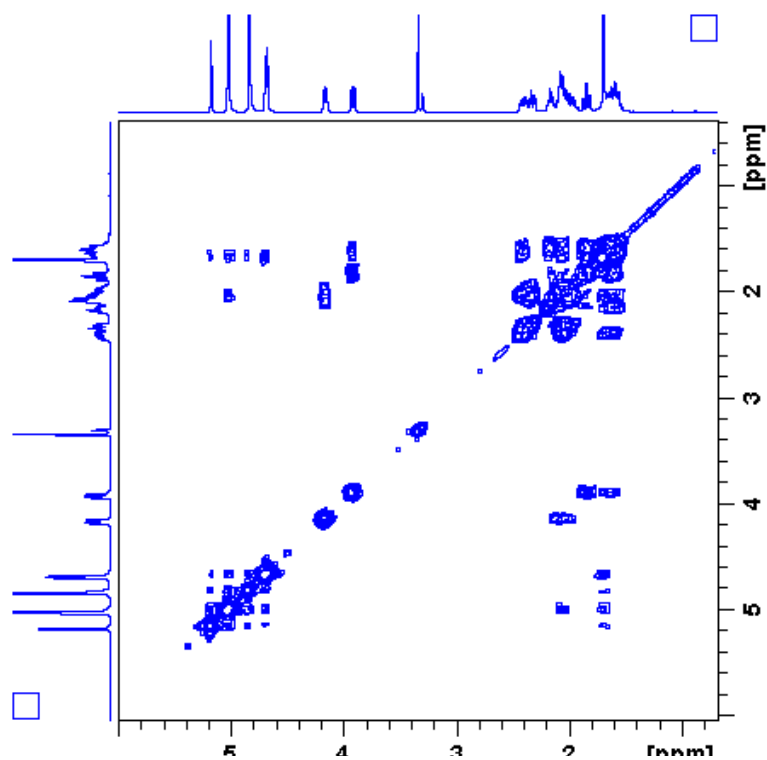**Figure S28.** gHSQC spectrum of Compound **4** in  $\text{CD}_3\text{OD}$ .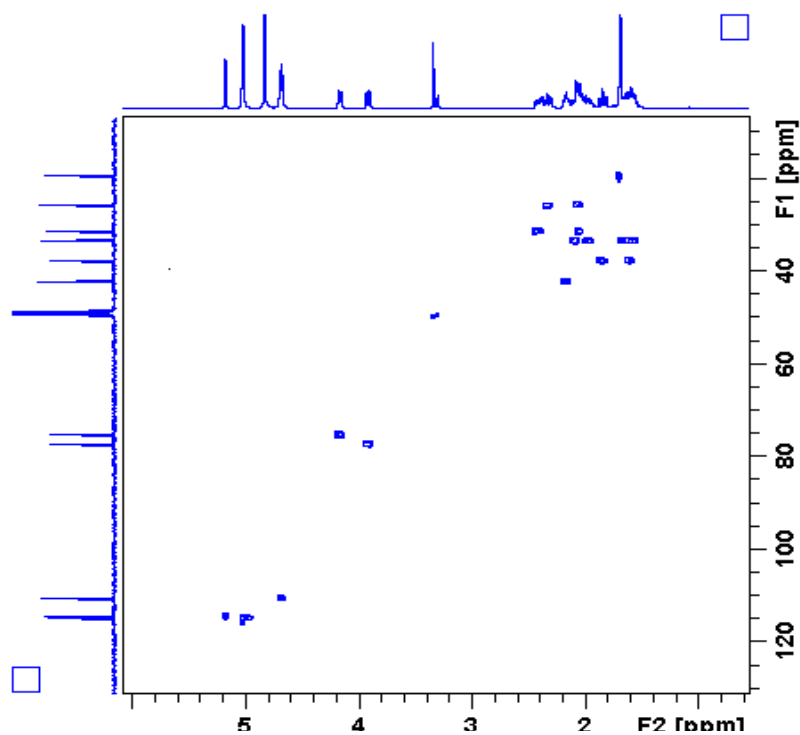

**Figure S29.** gHMBC spectrum of Compound **4** in CD<sub>3</sub>OD.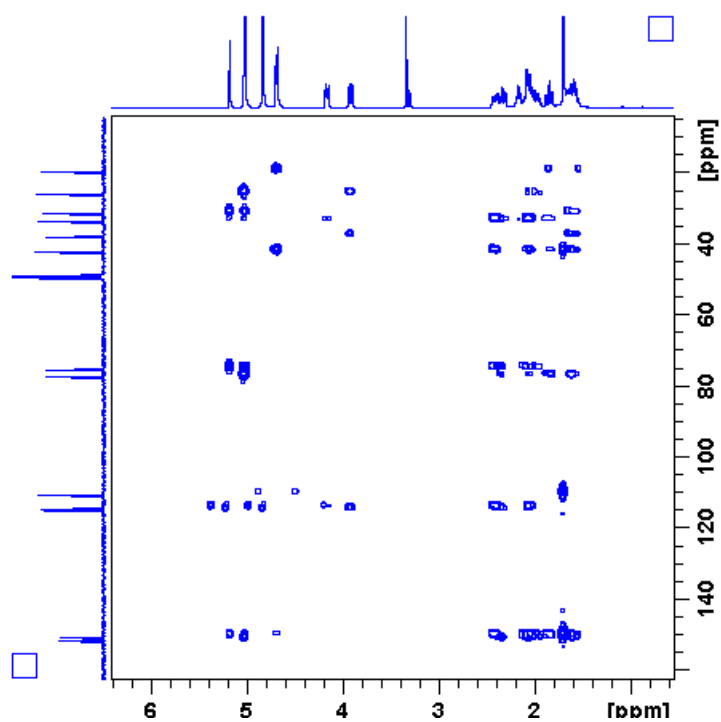**Figure S30.** NOESY spectrum of Compound **4** in CD<sub>3</sub>OD.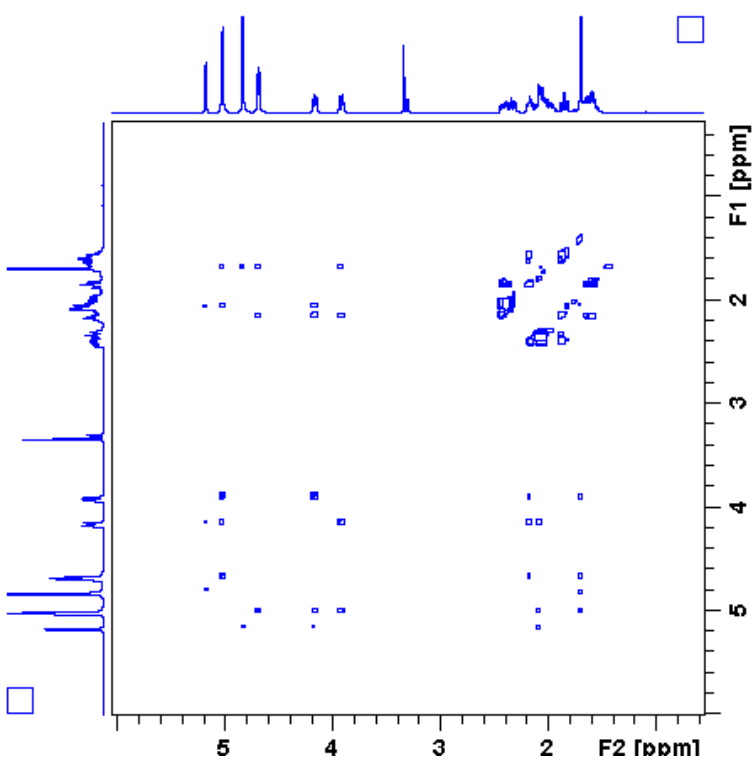

**Figure S31.** HRESIMS spectrum of Compound 4.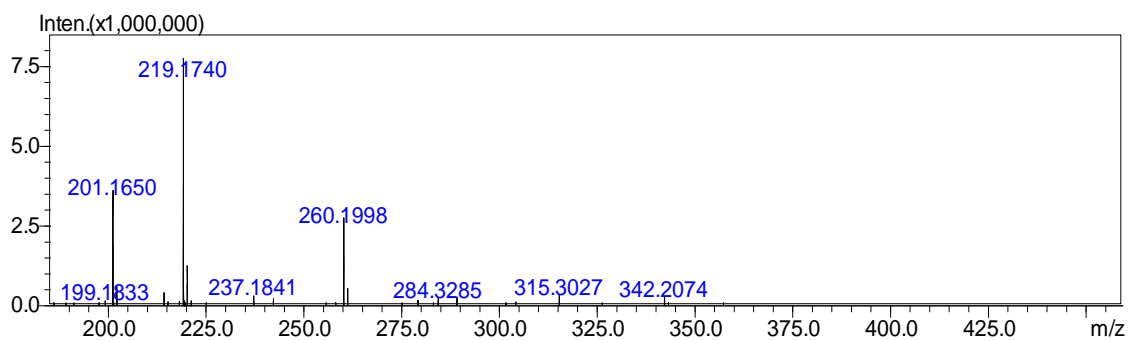**Figure S32.**  $^1\text{H}$ -NMR spectrum of Compound 5 in  $\text{CDCl}_3$ .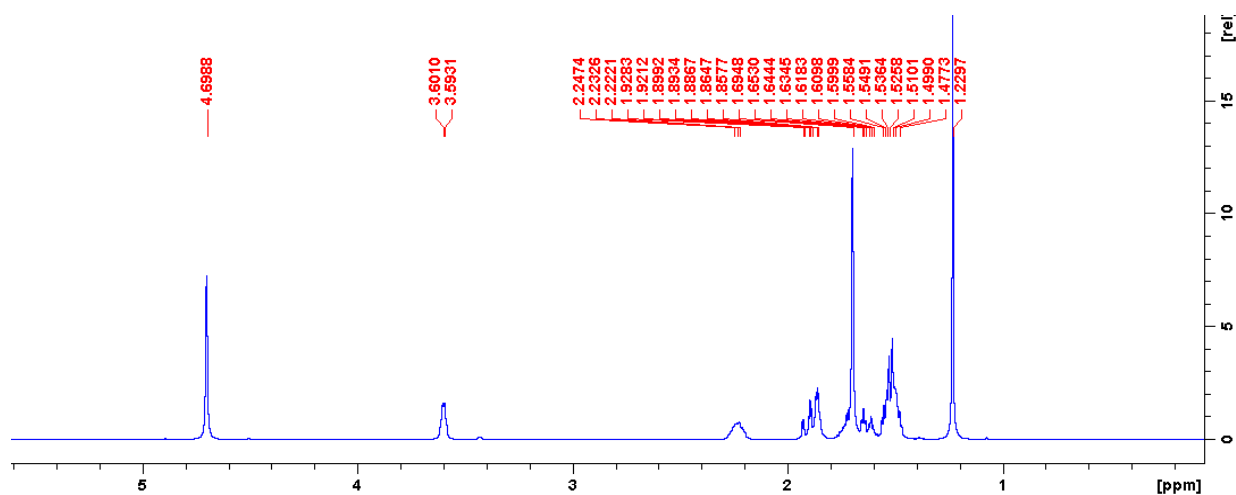**Figure S33.**  $^{13}\text{C}$ -NMR spectrum of Compound 5 in  $\text{CDCl}_3$ .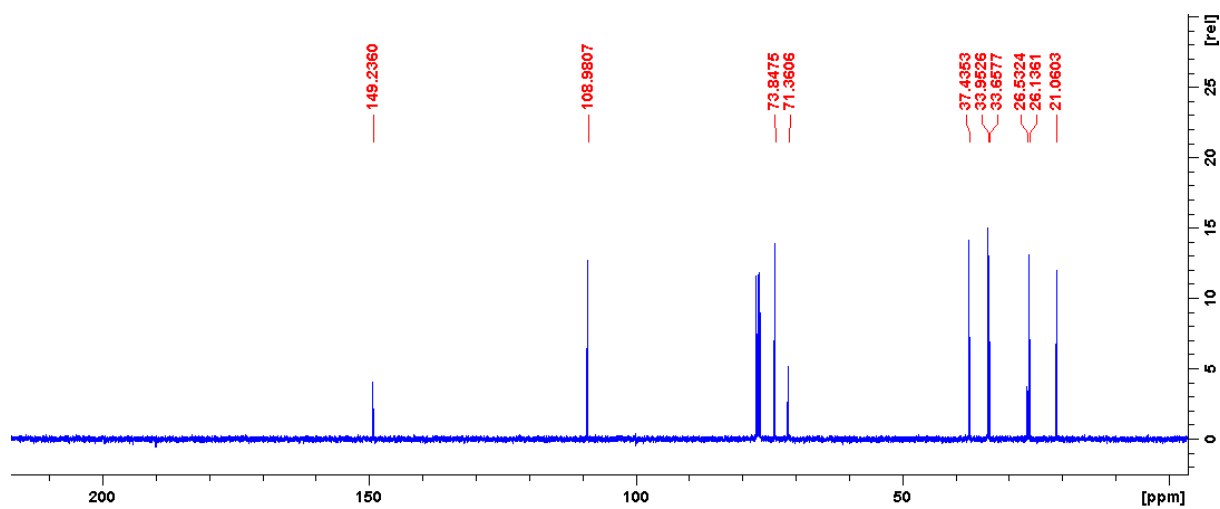

**Figure S34.**  $^1\text{H}$ - $^1\text{H}$  COSY spectrum of Compound **5** in  $\text{CDCl}_3$ .

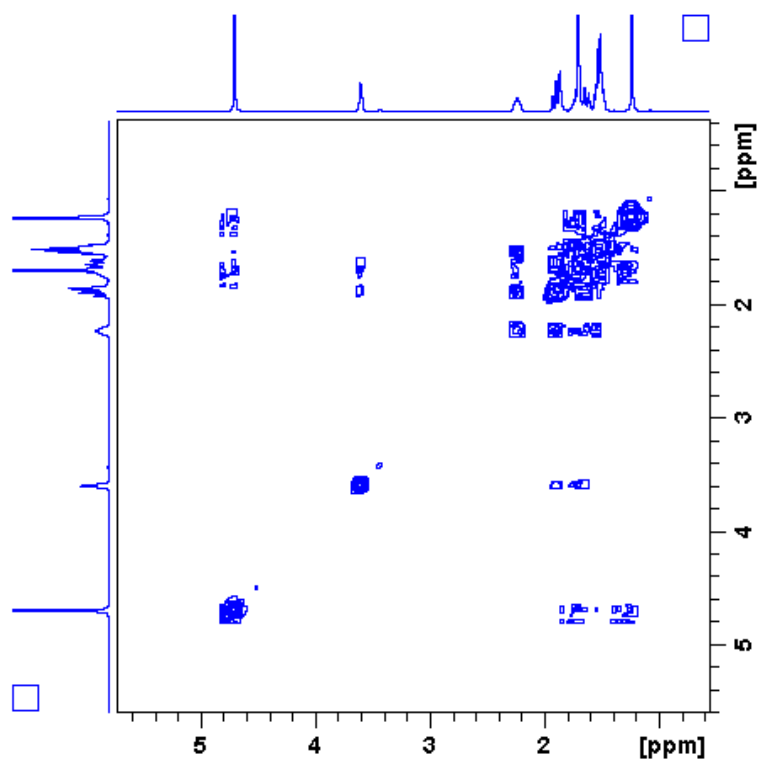

**Figure S35.** gHSQC spectrum of Compound **5** in  $\text{CDCl}_3$ .

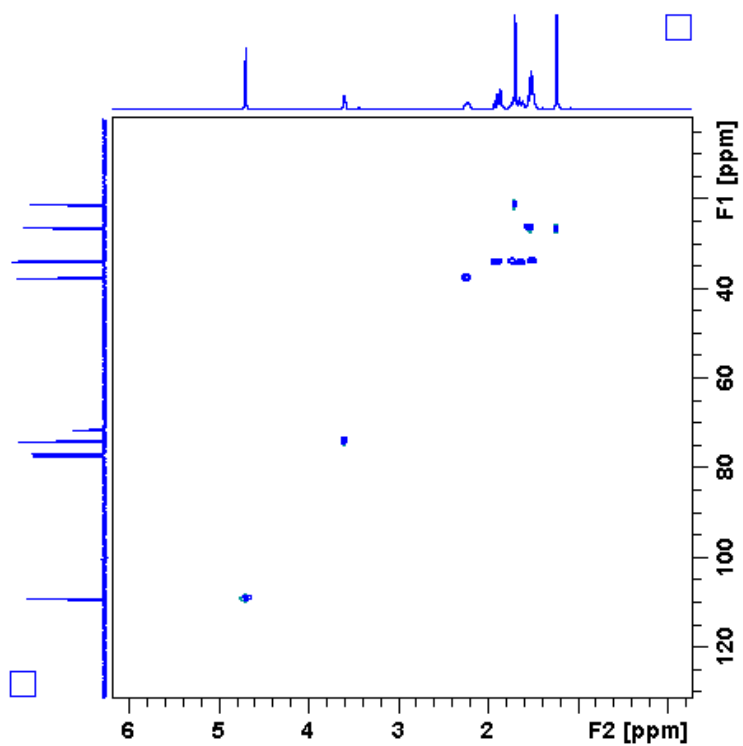

**Figure S36.** gHMBC spectrum of Compound **5** in CDCl<sub>3</sub>.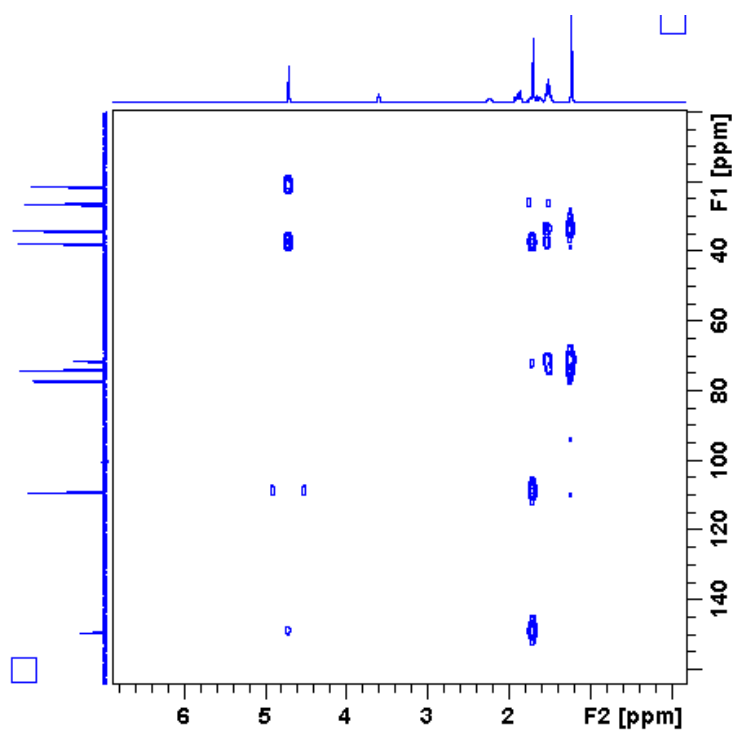**Figure S37.** NOESY spectrum of Compound **5** in CDCl<sub>3</sub>.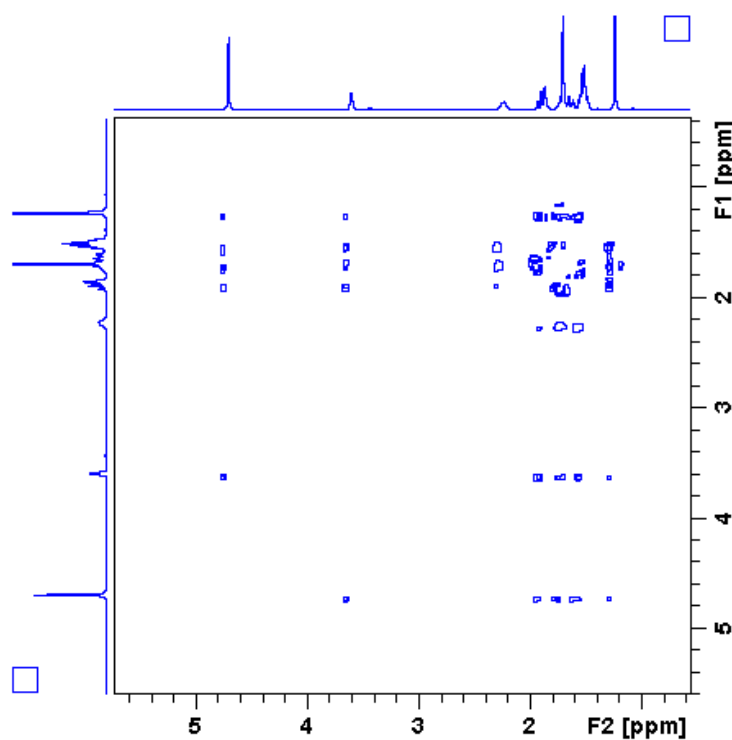

**Figure S38.** HRESIMS spectrum of Compound 5.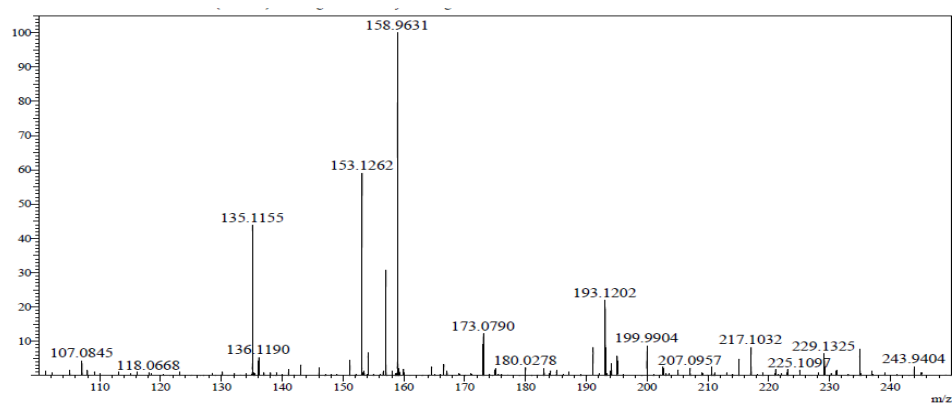

Supplement: Supplementary file 1 [file molecules-19-04326-s001.pdf]
